1  
2  
3  
4  
5  
6  
7  
8  
9  
10  
11  
12  
13  
14  
15  
16  
17  
18  
19  
20  
21

A new mechanism for ribosome rescue can recruit RF1 or RF2 to non-stop ribosomes

**Authors:**

Tyler D. P. Goralski<sup>1</sup>, Girish S. Kirimanjswara<sup>2</sup> and Kenneth C. Keiler<sup>1</sup>

**Author Affiliation:**

1. Department of Biochemistry and Molecular Biology, The Pennsylvania State University, University Park, PA 16802.
2. Department of Veterinary and Biomedical Science, The Pennsylvania State University, University Park, PA 16802

**Correspondence:**

Kenneth Keiler  
Email: kck11@psu.edu  
Tel: 814-863-0787

## 22 **Abstract**

23 Bacterial ribosomes frequently translate to the 3' end of an mRNA without terminating at  
24 an in-frame stop codon. In all bacteria studied to date, these non-stop ribosomes are  
25 rescued using *trans*-translation. In some species, genes required for *trans*-translation  
26 are essential, but other species can survive without *trans*-translation because they  
27 express an alternative ribosome rescue factor, ArfA or ArfB. *Francisella tularensis* cells  
28 lacking *trans*-translation are viable, but *F. tularensis* does not encode ArfA or ArfB.  
29 Transposon mutagenesis followed by deep sequencing (Tn-seq) identified a new  
30 alternative ribosome rescue factor, now named ArfT. *arfT* can be deleted in wild-type  
31 cells but not in cells that lack *trans*-translation activity. Over-expression of ArfT  
32 suppresses the slow growth phenotype in cells lacking *trans*-translation and counteracts  
33 growth arrest caused by *trans*-translation inhibitors, indicating that ArfT rescues non-  
34 stop ribosomes *in vivo*. Ribosome rescue assays *in vitro* show that ArfT promotes  
35 hydrolysis of peptidyl-tRNA on non-stop ribosomes in conjunction with *F.*  
36 *tularensis* release factors. Unlike ArfA, which requires RF2 for activity, ArfT can function  
37 with either RF1 or RF2. Overall, these results indicate that ArfT is a new alternative  
38 ribosome rescue factor with a distinct mechanism from ArfA and ArfB.

## 39 **Importance**

40 *Francisella tularensis* is a highly infectious intracellular pathogen that kills more than  
41 half of infected humans if left untreated. *F. tularensis* has also been classified as a  
42 potential bioterrorism agent with the greatest risk for deliberate misuse. Recently,  
43 compounds that inhibit ribosome rescue have been shown to have antibiotic activity

44 against *F. tularensis* and other important pathogens. Like all bacteria that have been  
45 studied, *F. tularensis* uses *trans*-translation as the main pathway to rescue stalled  
46 ribosomes. However, unlike most bacteria, *F. tularensis* can survive without any of the  
47 known factors for ribosome rescue. Our work identifies a *F. tularensis* protein, ArfT, that  
48 rescues stalled ribosomes in the absence of *trans*-translation using a new mechanism.  
49 These results indicate that ribosome rescue activity is essential in *F. tularensis* and  
50 suggest that ribosome rescue activity might be essential in all bacteria.

51

## 52 **Introduction**

53 Bacterial ribosomes frequently translate to the 3' end of an mRNA that does not have a  
54 stop codon (1-3). These non-stop ribosomes cannot terminate translation using one of  
55 the canonical termination factors, RF1 or RF2, because they require interactions with  
56 the stop codon to activate peptidyl-tRNA hydrolysis (4,5). Data from *E. coli* indicate that  
57 5-10% of ribosomes that initiate translation do not terminate translation at a stop codon  
58 on the mRNA, and instead have to be rescued (2,3). The primary ribosome rescue  
59 pathway in all bacteria that have been investigated is *trans*-translation (1,2,6). In this  
60 pathway, the tmRNA-SmpB complex recognizes a non-stop ribosome and uses a tRNA-  
61 like domain of tmRNA and a specialized reading frame within tmRNA to tag the nascent  
62 polypeptide for degradation and release the non-stop ribosome (1,2,6-7). Genes  
63 encoding tmRNA (*ssrA*) and SmpB (*smpB*) have been identified in >99% of sequenced  
64 bacterial genomes, and in some species these genes are essential (1,8). In other  
65 species, *trans*-translation is not essential due to the presence of an alternative ribosome

66 rescue factor, ArfA or ArfB (9,10). ArfA is a short protein that inserts its C-terminal tail  
67 into the mRNA channel of non-stop ribosomes and rescues them by activating RF2 to  
68 hydrolyze the peptidyl-tRNA (10-16). ArfA does not interact with the RF2 residues that  
69 recognize a stop codon, but instead binds a different part of RF2 to stabilize the active  
70 conformation and promote peptidyl-tRNA hydrolysis (13-16). These interactions cannot  
71 be made with RF1, so ArfA only functions in conjunction with RF2 (11-16). ArfB also  
72 binds the empty mRNA channel of non-stop ribosomes with its C-terminal tail, but ArfB  
73 contains an RF1-like catalytic domain that can hydrolyze peptidyl-tRNA on non-stop  
74 ribosomes in the absence of RF1 or RF2 (17-20). In bacteria that have a functional ArfA  
75 or ArfB, deletions of *ssrA* and the gene encoding the alternative ribosome rescue factor  
76 are synthetically lethal, indicating that these species require at least one mechanism for  
77 rescuing non-stop ribosomes (9,10).

78 Although *ssrA* has been deleted from the pathogen *F. tularensis* (21), no homologs of  
79 *arfA* or *arfB* have been found in sequenced *F. tularensis* genomes. *F. tularensis* has a  
80 reduced genome size and a life cycle that is different from many other bacteria, so it is  
81 possible that ribosome rescue is not essential. Alternatively, *F. tularensis* may have an  
82 alternative ribosome rescue system that is sufficiently different from ArfA and ArfB that it  
83 cannot be identified by homology searches. *F. tularensis* is a Gram-negative, facultative  
84 intracellular bacterium responsible for the vector-borne zoonosis tularemia (22-28).  
85 Pneumonic tularemia is infectious at  $\leq 10$  colony-forming units (cfu) of aerosolized  
86 bacteria, and has a 60% mortality rate if left untreated (22-27). *F. tularensis* has been  
87 classified as a Tier 1 Select Agent by the CDC because the bacteria can be easily

88 propagated and disseminated as an aerosol, making the threat of a bioterrorist attack  
89 with an antibiotic-resistant strain of *F. tularensis* a significant concern (26, 27).

90 To determine if ribosome rescue is essential in *F. tularensis*, we screened for an  
91 alternative ribosome rescue factor using transposon mutagenesis followed by deep  
92 sequencing (Tn-seq) in *F. tularensis* ssp. holarctica Live Vaccine Strain (LVS). One  
93 gene, *FTA\_0865*, renamed here as alternative ribosome rescue factor T (ArfT) was  
94 found to be essential in cells lacking *trans*-translation but not in wild-type *F. tularensis*.  
95 We show that ArfT can rescue non-stop ribosomes *in vivo* and *in vitro*, and that ArfT can  
96 function in conjunction with either RF1 or RF2. These data indicate that ribosome  
97 rescue is essential in *F. tularensis* and that ArfT is the first representative of a new  
98 family of alternative ribosome rescue factors that can recruit either RF1 or RF2 to non-  
99 stop ribosomes.

100

## 101 **Results**

### 102 **Identification of an alternative rescue factor in *F. tularensis*.**

103 A published report demonstrated that an *F. tularensis* strain in which *ssrA* was disrupted  
104 by insertion of an LtrB intron (*ssrA::LtrB-bp147*) was viable (21). We used RT-PCR to  
105 confirm that there was no detectable tmRNA in *ssrA::LtrB-bp147* cells (Fig. S1),  
106 suggesting that either ribosome rescue is not essential in *F. tularensis* or that *F.*  
107 *tularensis* has another mechanism to rescue non-stop ribosomes. Homology searches  
108 of the *F. tularensis* genome using sequences or motifs from ArfA and ArfB did not  
109 identify any candidate alternative ribosome rescue factors. Therefore, we took a genetic

110 approach to identify genes that might be involved in an alternative ribosome rescue  
111 pathway. If *F. tularensis* has an unknown alternative ribosome rescue pathway, genes  
112 required for the alternative pathway should be essential in *ssrA::LtrB-bp147* cells but not  
113 in wild-type cells. We used Tn-seq to identify genes that could be disrupted in each  
114 strain. Cells from each strain were mutagenized with a Himar1-based transposon (29,  
115 30) and the transposon insertion sites were sequenced. The ratio of the normalized  
116 number of insertions in *ssrA::LtrB-bp147* to the normalized number of insertions in wild-  
117 type was used to identify genes that were much less fit in *ssrA::LtrB-bp147* (Table S1).  
118  
119 Among the genes with no insertions in *ssrA::LtrB-bp147* and typical insertion density in  
120 the wild-type strain, *arfT* was a candidate alternative ribosome rescue factor because it  
121 shared some characteristics with ArfA and had no annotated function (Fig. 1A). *arfT*  
122 encodes a protein of 40 amino acids, whereas mature ArfA has 52-55 amino acids, and  
123 ArfT contains a stretch of residues near the C terminus that are similar to a conserved  
124 KGKGS sequence found in ArfA (Fig. 1B). Structural studies of ArfA indicate the  
125 KGKGS sequence binds in the empty mRNA channel of non-stop ribosomes. A tblastn  
126 search (31) showed that ArfT homologues are found in other *F. tularensis* subspecies  
127 and in the closely related *F. hispaniensis*, but not in more distantly related species  
128 (Table S2). *arfT* was not previously annotated as an open reading frame in *F. tularensis*  
129 LVS, the SchuS4 strain, or a number of other sequenced *F. tularensis* strains, but was  
130 annotated in *F. tularensis ssp. holarctica* FTNF002-00. For this reason, transposon  
131 insertions were mapped to this genome.  
132

133 **Figure 1: Tn-seq identified *arfT* as a candidate alternative ribosome rescue**

134 **system.** (A) Representation of Tn-seq data. The portion of the *F. tularensis ssp.*  
135 *holarctica FTNF002-00* chromosome containing *arfT* with genes transcribed to the right  
136 in red and those transcribed to the left in blue (top) is shown with mapped transposon  
137 insertion sites (red and blue dots) in *ssrA::LtrB-bp147* and wild-type *F. tularensis* (wt).  
138 The number of insertions per gene was normalized to the total number of reads and the  
139 log ratio of the normalized number of insertions was plotted (center) to identify genes  
140 that can be deleted in wild type but not in *ssrA::LtrB-bp147*. (B) Alignment of *E. coli* ArfA  
141 and ArfT protein sequences. The KGKGS motif that is conserved in ArfA genes and that  
142 binds the empty mRNA channel of the ribosome is shown in red, as are the  
143 corresponding residues in ArfT.

144

145 **Deletion of *arfT* is synthetically lethal with disruption of *ssrA*.**

146 The Tn-seq data suggested that the absence of both *trans*-translation and ArfT is lethal  
147 to *F. tularensis* cells. This prediction was tested by attempting to produce markerless,  
148 in-frame deletions of *arfT* using a two-step recombination procedure (32) in wild type,  
149 *ssrA::LtrB-bp147*, and *ssrA::LtrB-bp147* with a plasmid-borne copy of *ssrA* expressed  
150 from a strong, constitutive promoter (*ssrA::LtrB-bp147 pFtssrA*). In the first step of this  
151 procedure, a suicide plasmid containing a copy of the *arfT* locus with the *arfT* coding  
152 sequence deleted was recombined into the chromosome. The second recombination  
153 step eliminates one copy of the *arfT* locus, so cells can retain either the *arfT* deletion or  
154 the wild-type *arfT* gene (Fig. S2) (32). The first recombination step was successful in all  
155 strains. For the wild-type strain, 20% of the second-step recombinants had the *arfT*

156 deletion, demonstrating that *arfT* is not essential. Deletion of *arfT* did not cause a large  
157 defect in growth or morphology (Fig. 3). For the *ssrA::LtrB-bp147* strain, 100 second-  
158 step recombinants were screened and all had retained the wild-type copy of *arfT*,  
159 indicating that disruption of both *ssrA* and *arfT* was lethal. When a plasmid-borne copy  
160 of *ssrA* was present in *ssrA::LtrB-bp147* cells, 20% of the second-step recombinants  
161 has *arfT* deleted, demonstrating that the synthetic-lethal phenotype can be  
162 complemented by an ectopic copy of *ssrA*. FTA\_0993, a gene that had transposon  
163 insertions in both wild type and *ssrA::LtrB-bp147* in the Tn-seq experiment, was  
164 successfully deleted from the *ssrA::LtrB-bp147* strain (Fig. S2), confirming that  
165 *ssrA::LtrB-bp147* cells are competent for recombination in the two-step procedure.  
166 Taken together, these data demonstrate that deletion of *arfT* is lethal to *F. tularensis*  
167 cells lacking *trans*-translation, and indicate that ribosome rescue is required in *F.*  
168 *tularensis*.

169

170 **ArfT can recruit either RF1 or RF2 to hydrolyze peptidyl-tRNA on non-stop**  
171 **ribosomes *in vitro*.**

172 *In vitro* ribosome rescue assays were performed to assess whether ArfT was capable of  
173 rescuing non-stop ribosomes. Non-stop ribosomes were generated by programming a  
174 transcription-translation reaction with a gene that does not have a stop codon (DHFR-  
175 NS) (Fig. 2) (9). In the absence of ribosome rescue, peptidyl-tRNA is stable on the  
176 ribosome and could be observed on protein gels. As expected for non-stop ribosomes,  
177 addition of RF1, RF2, and RF3 from *E. coli* or RF1 and RF2 from *F. tularensis* did not  
178 dramatically decrease the amount of peptidyl-tRNA. Addition of ArfT alone did not



179 promote hydrolysis of the peptidyl-tRNA, indicating that ArfT does not have intrinsic  
180 hydrolytic activity to rescue non-stop ribosomes. Likewise, addition of ArfT in  
181 conjunction with RF1, RF2, and RF3 from *E. coli* did not promote peptidyl-tRNA  
182 hydrolysis. However, addition of ArfT with *F. tularensis* RF1 resulted in 95% peptidyl-  
183 tRNA hydrolysis and addition of ArfT with *F. tularensis* RF2 resulted in 84% peptidyl-  
184 tRNA hydrolysis (Fig 2). These data suggest that ArfT can rescue ribosomes by  
185 recruiting either RF1 or RF2 to non-stop ribosomes.

186

187 **Figure 2: ArfT promotes peptidyl-tRNA hydrolysis on nonstop ribosomes in**  
188 **conjunction with either RF1 or RF2.** Gel image of in vitro ribosome rescue assays. In  
189 vitro transcription/translation assays were programmed with a non-stop DNA template  
190 and synthesized protein was labeled by incorporation of <sup>35</sup>S-methionine. ArfT and  
191 release factors were added to individual reactions in the combinations indicated. Bands  
192 corresponding to peptidyl-tRNA and free protein were quantified. The percentage of  
193 protein in the peptidyl-tRNA band and the percentage of peptidyl-tRNA that was  
194 hydrolyzed compared to a reaction with no release factors or ArfT added (release  
195 activity) are shown ( $\pm$  standard deviation). The data are averages of 3 biological  
196 replicates.

197

198 **Over-expression of *arfT* rescues the growth defect in cells lacking *trans-***  
199 **translation.**

200 It was previously reported that the *ssrA::LtrB-bp147* strain grows much slower than wild  
201 type in liquid culture, and that this growth defect could be complemented by expression

202 of *ssrA* from a plasmid (21). To determine whether overexpression of *arfT* could restore  
203 normal growth to cells in the absence of *trans*-translation, we cloned *arfT* under the  
204 control of the strong, constitutive bacterioferritin (Bfr) promoter on a multicopy plasmid  
205 (pArfT) and tested its impact on growth rate. As expected, the *ssrA::LtrB-bp147* grew  
206 substantially slower than wild-type, but *ssrA::LtrB-bp147 pFtssrA* grew at the same rate  
207 as wild-type (Fig. 3). *ssrA::LtrB-bp147* cells with pArfT also grew at the same rate as  
208 wild-type, indicating that multi-copy *arfT* can suppress the *ssrA* phenotype. pArfT did not  
209 increase the growth rate of wild-type cells (Fig. 4). These results suggest that ArfT can  
210 rescue non-stop ribosomes in the absence of *trans*-translation.

211

212 **Figure 3: Overexpression of ArfT rescues the growth defect in *ssrA::LtrB-bp147*.**

213 Growth curves of wild-type *F. tularensis* (wt), the  $\Delta arfT$  strain, and the *ssrA::LtrB-bp147*  
214 strain (*ssrA*<sup>-</sup>) with and without plasmids expressing *ssrA* (pFtssrA) or *arfT* (pArfT). Error  
215 bars indicate standard deviation. The doubling time for each strain ( $\pm$  standard  
216 deviation) is indicated. The data are averages of 3 biological replicates.

217

218

219 **Figure 4: Over-expression of ArfT prevents growth inhibition caused by ribosome**

220 **rescue inhibitors.** Growth curves of wild-type *F. tularensis* (wt) with and without  
221 plasmids expressing *ssrA* (pFtssrA) or *arfT* (pArfT). A ribosome rescue inhibitor, KKL-40  
222 (structure shown), was added to half the cultures after 6 h (indicated by arrow) at 10X  
223 MIC. Cultures with KKL-40 are shown by dotted lines and cultures with no drug are

224 shown by solid lines. The data are averages of 3 biological replicates, with error bars  
225 indicating the standard deviation.

226

227 **Over-expression of ArfT prevents growth arrest due to ribosome rescue**  
228 **inhibitors.**

229 It has been shown that a class of oxadiazole compounds such as KKL-40 inhibit  
230 ribosome rescue and arrest the growth of many bacterial species, including *F. tularensis*  
231 (33-35). Over-expression of *E. coli* ArfA prevents growth arrest by these oxadiazoles in  
232 *Shigella flexneri*, confirming that growth arrest is due to inhibition of ribosome rescue  
233 (33,34). If ArfT has ribosome rescue activity similar to ArfA, over-expression of ArfT  
234 should inhibit growth arrest in *F. tularensis* by KKL-40. To test this prediction, KKL-40  
235 was added to growing cultures of *F. tularensis* strains and growth was monitored over  
236 18 h (Fig. 4). As previously observed, addition of KKL-40 resulted in growth arrest of  
237 wild-type *F. tularensis* and the bacteria were unable to recover to normal levels.  
238 Addition of KKL-40 to *F. tularensis* carrying pFtsrA or pArfT caused an initial decrease  
239 in growth rate, but after 18 h the cultures had reached the same density as wild type.  
240 Because growth inhibition is suppressed by extra ribosome rescue activity in the form of  
241 either tmRNA-SmpB or ArfT, it is likely that KKL-40 inhibits growth through ribosome  
242 rescue and not through off-target effects. These results are consistent with a model in  
243 which KKL-40 arrests growth in *F. tularensis* by binding to non-stop ribosomes and  
244 tmRNA-SmpB or ArfT can counteract the effects of KKL-40 by rescuing the ribosomes  
245 before KKL-40 binds.

246

247 **Discussion**

248 The data described here answer two of the recently posed outstanding questions for  
249 ribosome rescue: Are there other alternative rescue factor systems, and will ArfA-like  
250 systems emerge in bacteria where RF1 is recruited to non-stop ribosomes (36)? The  
251 answer to both questions is yes. The data presented here indicate that ArfT has all the  
252 characteristics of an alternative ribosome rescue factor in *F. tularensis*. ArfT has  
253 ribosome rescue activity *in vitro* because it can release non-stop ribosomes in  
254 conjunction with RF1 or RF2. *In vivo*, deletion of *arfT* is synthetically lethal with  
255 disruption of *ssrA*, consistent with ArfT providing essential ribosome rescue activity in  
256 the absence of *trans*-translation. Over-expression of ArfT suppresses the slow growth  
257 phenotype in cells lacking *trans*-translation and counteracts growth arrest by a ribosome  
258 rescue inhibitor in *F. tularensis*, indicating that ArfT can perform the same physiological  
259 role as *trans*-translation in *F. tularensis*. These results demonstrate that the presence of  
260 ArfT in *F. tularensis* makes *trans*-translation dispensable, and that ribosome rescue  
261 activity is essential in *F. tularensis*.

262

263 ArfT has some similarities to ArfA and these factors may recognize non-stop ribosomes  
264 in the same manner. The C-terminal tail of ArfA binds in the empty mRNA channel of  
265 non-stop ribosomes through a number of lysine and arginine residues including a  
266 conserved KGKGS motif (13-16). None of these residues are essential for ArfA activity  
267 (16, 37), but replacement of individual residues decreases ribosome rescue activity *in*  
268 *vitro* (16). The KKGSTNKK sequence near the C-terminus of ArfT has an arrangement  
269 of positively charged residues that is similar to those in ArfA, suggesting that ArfT may

270 use this sequence to bind the ribosome. SmpB and ArfB also bind in the empty mRNA  
271 channel of non-stop ribosomes using positively charged C-terminal tails, but ArfA,  
272 SmpB, and ArfB each make different interactions with the mRNA channel (7,13-20,37).  
273 Because of this variation in binding, structural studies will be required to define the  
274 interactions between ArfT and the ribosome.

275

276 Despite the similarities in protein size and C-terminal tail sequence between ArfT and  
277 ArfA, the observation that ArfT can activate RF1 or RF2 suggests that ArfT may not  
278 interact with release factors in the same way as ArfA. Cryo-EM analyses of a non-stop  
279 ribosome bound to *E. coli* ArfA-RF2 showed that residues 15-31 of ArfA interact with  
280 RF2 to stabilize the active conformation of RF2 and promote hydrolysis of the peptidyl-  
281 tRNA (13-16). In a key feature of this interaction, ArfA forms a  $\beta$ -strand that extends the  
282  $\beta$ -sheet formed by  $\beta$ 4- $\beta$ 5 of RF2, with F25 of ArfA binding in a hydrophobic pocket  
283 formed by V198 and F217 of RF2. Residues in RF2  $\beta$ 4- $\beta$ 5 and the SPF loop are highly  
284 conserved between *E. coli* RF2 and *F. tularensis* RF2 (Fig. S3), raising the possibility  
285 that ArfT could bind in a similar manner as ArfA. However, ArfT does not have a  
286 hydrophobic residue at the position corresponding to F25 (Fig. 1B). The absence of the  
287 V198-F217 pocket in *E. coli* RF1 has been suggested to be the reason ArfA does not  
288 activate *E. coli* RF1 (13-16). This region of *E. coli* RF1 is highly conserved in *F.*  
289 *tularensis* RF1, yet ArfT activates *F. tularensis* RF1 but not *E. coli* RF1. Therefore, if the  
290 interaction between ArfT and RF2 is similar to the interaction between ArfA and RF1,  
291 ArfT would have to activate RF1 through a distinct mechanism. Alternatively, ArfT may  
292 activate *F. tularensis* RF1 and RF2 in the same manner, but through a different

293 mechanism than that used by ArfA. Little was known about the interactions among ArfA,  
294 RF2, and the ribosome before structural data of the complex was obtained, and similar  
295 studies will be required to understand how ArfT can activate both RF1 and RF2.

296

297 Another likely difference between ArfT and ArfA is regulation. The *arfA* gene includes a  
298 transcriptional terminator and RNase III cleavage site before the stop codon, such that  
299 ArfA protein is made from non-stop mRNA (38,39). When *trans*-translation is active, the  
300 nascent ArfA peptide is tagged and degraded, but if *trans*-translation activity is not  
301 available active ArfA is produced and accumulates in the cell. This genetic arrangement  
302 makes ArfA a true backup ribosome rescue system, functioning only when *trans*-  
303 translation activity is low or absent (38,39). The *arfT* gene does not include a  
304 transcriptional terminator or an RNase III cleavage site before the stop codon. RT-PCR  
305 using a primer corresponding to the final 33 nucleotides of the *arfT* reading frame  
306 (including the stop codon) showed that *arfT* mRNA accumulated in wild-type *F.*  
307 *tularensis* and the *ssrA*-disrupted strain at similar levels (Fig. S4). Although these  
308 results do not exclude the possibility that *arfT* mRNA is truncated in the last few codons,  
309 it does not appear to be controlled by transcriptional termination and RNase III cleavage  
310 in the same manner as ArfA.

311

312 The observations that ArfT interacts with RF1 and is not regulated like ArfA, and the  
313 overall low sequence similarity between ArfT and ArfA, suggest that ArfT evolved  
314 independently from ArfA and represents a third different alternative ribosome rescue  
315 factor. Our sequence homology searches only identified ArfT in closely related *F.*

316 *tularensis* and *F. hispaniensis* strains, but the small size of ArfT makes more distant  
317 homologs difficult to identify with this method. Characterization of the ArfT residues  
318 required for interaction with RF1 and RF2 will allow more specific searches for ArfT in  
319 other species. The number of different ribosome rescue mechanisms discovered to-date  
320 suggests that the problem presented by non-stop ribosomes has been solved many  
321 times throughout evolution, and more alternative ribosome rescue factors may yet be  
322 discovered. It is not yet clear what conditions would limit *trans*-translation activity  
323 enough that an alternative ribosome rescue factor would be needed. However, such  
324 conditions must exist in a wide variety of environments. Alternative ribosome rescue  
325 factors have been selected for in enteric bacteria such as *E. coli*, which has ArfA,  
326 aquatic bacteria such as *C. crescentus*, which has ArfB, and intracellular pathogens  
327 such as *F. tularensis*, which has ArfT.

328

## 329 **Materials and Methods**

### 330 **Bacterial culture**

331 Bacterial strains are listed in Table 1. *E. coli* DH10B was used for routine cloning  
332 procedures and was grown in Luria–Bertani (LB) broth (10% bacto-tryptone, 5% yeast  
333 extract, 10% NaCl, [pH 7.5]), or on LB agar supplemented with ampicillin (100 µg/mL),  
334 or kanamycin (30 µg/mL) where appropriate. *F. tularensis* was grown in Chamberlain’s  
335 defined medium (CDM) (40) adjusted to pH 6.2 at 37°C with shaking, or on chocolate  
336 agar plates (Mueller-Hinton agar supplemented with 1% bovine hemoglobin [Remel,  
337 USA] and 1% Isovitalex X Enrichment [Becton Dickinson, France]) at 37°C in a  
338 humidified incubator with 5% CO<sub>2</sub> for 48-72 h. Kanamycin (10 µg/mL), tetracycline (10

339  $\mu\text{g/mL}$ ), and sucrose (5%) were added to cultures and plates where appropriate. For  
340 growth curve experiments, *F. tularensis* cultures were grown in CDM overnight at 37°C  
341 and 200 rpm and back diluted to an optical density at 600 nm ( $\text{OD}_{600}$ ) of 0.05. Growth  
342 was monitored by performing  $\text{OD}_{600}$  readings. When indicated, 1.4  $\mu\text{g/mL}$  KKL-40 was  
343 added 6 h post inoculum.

344

### 345 **Plasmid construction**

346 Oligonucleotide sequences are provided in Table S3 in the supplemental material. To  
347 generate plasmids pMP812- $\Delta\text{ArfT}$  and pMP812- $\Delta\text{0993}$  600 basepair PCR products  
348 flanking the gene to be deleted were amplified using primers ArfT\_UF, ArfT\_UR,  
349 ArfT\_DF, ArfT\_DR, and 0993\_UF, 0993\_UR, 0993\_DF, 0993\_DR, digested with  
350 BamHI, and ligated together. The sequence was then reamplified as one unit with  
351 primers ArfT\_UF, ArfT\_DR, and 0993\_UF, 0993\_DR, and cloned into pMP812 using  
352 Sall and NotI restriction sites. Plasmids pArfT and pFtssrA were constructed by  
353 amplifying the coding sequences of each gene using primers ArfT\_CF and ArfT\_CR,  
354 and FtssrA\_CF and FtssrA\_CR. The Bfr promoter (41) was amplified using primers  
355 Bfr\_F and Bfr\_R, ligated upstream of either the ArfT or ssrA PCR product using a  
356 BamHI restriction site, and reamplified as one unit with primers Bfr\_F, and either  
357 ArfT\_CR or ssrA\_CR. The resulting PCR product was digested with Eco RI and ligated  
358 into the plasmid pKK214-MCS<sub>4</sub> (41). In order to construct plasmids pET28ArfT,  
359 pET28RF1, and pET28RF2, primers RF1\_PF, RF1\_PR, RF2\_PF, RF2\_PR, and  
360 ArfT\_PF, ArfT\_PR, were used to generate PCR products of the protein coding  
361 sequence of RF1, RF2, and ArfT from *F. tularensis*. The PCR products were then



362 cloned into pET28a(+) using NdeI and XhoI restriction sites for protein expression of  
363 ArfT, as well as release factor 1 (RF1), and release factor 2 (RF2) from *F. tularensis*.

364

### 365 **Tn-seq**

366 Overnight cultures of wild-type *F. tularensis* and the *ssrA::LtrB-bp147* strain were grown  
367 to OD<sub>600</sub> = 0.5, washed 3x with 500 mM sucrose, and transformed with ~300 ng of the  
368 plasmid pHimar H3. Over 50,000 colonies were pooled, and chromosomal DNA was  
369 extracted. The libraries were prepared and sequenced on an Illumina HiSeq 2000 by  
370 FASTERIS (location). The data were mapped to the genome of *F. tularensis ssp.*  
371 *holarctica* FTNF002-00, and analyzed in Geneious version 11.1.4 using parameters  
372 described previously (9). The frequency of transposition for each gene was quantified  
373 in both strain backgrounds. Additionally, the relative fitness of each gene in both strains  
374 was quantified by looking at the ratio of the number of times a sequence was recovered  
375 in the *ssrA* mutant as compared to wt. Insertion ratio data was generated for each gene  
376 to determine if genes were essential in the absence of *ssrA* (Table S1).

377

### 378 **Purification of ArfT, *F. tularensis* RF1, and *F. tularensis* RF2.**

379

380 Strains TG001, TG002, and TG003 were grown to OD<sub>600</sub> ~ 0.8, and the expression of  
381 ArfT, RF1 or RF2 was induced by the addition of isopropyl-β-D-thiogalactopyranoside  
382 (IPTG) to 1 mM. Cells were harvested by centrifugation, resuspended in native lysis  
383 buffer (50 mM sodium phosphate 300 mM NaCl, 5 mM imidazole, [pH 8.0]), and  
384 sonicated or processed through a French press. The lysate was cleared by

385 centrifugation at 14,000 *g* for 10 min. Ni-nitrilotriacetic acid (NTA) agarose (Qiagen)  
386 that had been equilibrated with lysis buffer, was added to the cleared lysate, followed by  
387 incubation with gentle rocking at 4 °C for 1 h. The slurry was packed in a column, and  
388 washed with 10 volumes of native wash buffer (50 mM sodium phosphate, 300 mM  
389 NaCl, 20 mM imidazole, [pH 8.0]). Bound protein was eluted with native elution buffer  
390 (50 mM sodium phosphate, 300 mM NaCl, 250 mM imidazole, [pH 8.0]), and visualized  
391 by SDS-PAGE. Fractions containing 6xHis-protein were dialyzed against RF or ArfT  
392 storage buffer (50 mM HEPES, 300 mM NaCl, [pH 7.5] for FTA\_0865, 50 mM Tris-HCl,  
393 300 mM NaCl, [pH 7.0] for RF1 and RF2). The 6xHis-tag was removed from RF1 with  
394 the Thrombin CleanCleave Kit (Sigma-Aldrich) following the manufacturer's instructions.  
395 The cleaved RF1 protein solution was loaded with NTA agarose, incubated with gentle  
396 rocking at 4 °C for 1 h. The slurry was packed into a column, and the flow-through  
397 containing RF1 was collected. RF2 was dialyzed against Buffer A (50 mM Tris-HCl,  
398 100mM NaCl, [pH 7.0] and purified on a MonoQ column using an AKTA purifier (GE  
399 Healthcare Life Sciences). Proteins were visualized by SDS-PAGE and dialyzed into RF  
400 storage buffer.

401

#### 402 ***In vitro* translation and peptidyl hydrolysis assays**

403 ArfT peptidyl hydrolysis activity was assessed using a previously described assay (9).  
404 Briefly, non-stop DHFR was PCR amplified with primers HAF\_T7 and UTR\_DHFR\_FL,  
405 added to the PURExpress  $\Delta$ RFs system (New England Biolabs) A and B reaction  
406 mixtures and incubated for 1 h at 37°C. Where indicated, ArfT was added to a final  
407 concentration of 25  $\mu$ g/mL and *E. coli* or *F. tularensis* LVS RFs were added to a final

408 concentration of 500 µg/mL, and the reactions were incubated for 1 h at 37°C. Total  
409 protein was precipitated by addition of cold acetone, resuspended in sample loading  
410 buffer (5 mM sodium bisulfite, 50 mM MOPS [morpholinepropanesulfonic acid], 50 mM  
411 Tris base, 1 µM EDTA, 0.1% SDS, 5% glycerol, 0.01% xylene cyanol, 0.01%  
412 bromophenol blue), and resolved on a Bis-Tris gel using MOPS running buffer.

413

#### 414 **Genetic deletions**

415 Targeted, markerless in-frame deletions were generated for both *FTA\_0865* and  
416 *FTA\_0993* with a two-step allelic exchange system designed for *F. tularensis* using the  
417 pMP812 *sacB* suicide vector (32). *F. tularensis* strains were transformed with either  
418 pMP812-ArfT or pMP812-0993, and primary recombinants were selected on kanamycin  
419 after incubating at 37°C in a humidified incubator with 5% CO<sub>2</sub> for 48-72 h. Primary  
420 recombinants were grown overnight without selection and plated on 5% sucrose to  
421 select for secondary recombinants. Secondary recombinants were confirmed by  
422 replica plating on chocolate agar containing kanamycin, and chocolate agar without  
423 selection. Genetic deletions were confirmed via PCR using primers ArfT\_KOF and  
424 ArfT\_KOR, and 0993\_KOF and 0993\_KOR.

425

#### 426 **Acknowledgments**

427 The authors thank Wali Karzai for his contribution of the *ssrA::LtrB-bp147 F. tularensis*  
428 strain, and Dara Frank for her contribution of the Himar H3 plasmid. This work was  
429 funded by the Science Mathematics and Research for Transformation (SMART)  
430 Scholarship (to T.G.) and National Institutes of Health Grant GM121650 (to K.C.K.).

431

432

### 433 **Supplemental Figure Legends**

434

435 **Figure S1. No tmRNA is present in *ssrA::LtrB-bp147* cells.** qPCR results for  
436 amplification of tmRNA from cDNA prepared from wild-type *F. tularensis* (wt) or the  
437 *ssrA::LtrB-bp147* strain. The relative florescence units (RFU) are plotted as a function of  
438 PCR cycle, and the positive amplification threshold is indicated by the black line. These  
439 results show the amount of tmRNA in *ssrA::LtrB-bp147* is decreased by a factor of  $>10^8$   
440 compared to the amount in wt.

441

442 **Figure S2. Deletion of *arfT* is synthetically lethal with deletion of *ssrA*.** Diagnostic  
443 PCR was performed to determine if secondary recombinants from allelic exchange were  
444 deletions or reversions to wild type. One example of each strain is shown. Lanes 2-5  
445 are PCR products from reactions using ArfT\_KO primers, and lanes 6-9 are PCR  
446 products from reactions using 0993\_KO primers. The ArfT\_KO primers amplify a 690  
447 bp product for the wild type and a 570 bp product for a deletion of *arfT*. The 0993\_KO  
448 primers amplify a 670 bp product for the wild type and a 330 bp product for deletions.  
449 Lanes: 1. DNA marker; 2. wt control DNA; 3. *arfT* deletion in wt; 4. *arfT* deletion in  
450 *ssrA::LtrB-bp147* + pFtssrA; 5. reversion to wild type in *ssrA::LtrB-bp147*; 6. Wt control  
451 DNA; 7. FTA\_0993 deletion in wt; 8. FTA\_0993 deletion in *ssrA::LtrB-bp147* + pFtssrA;  
452 9. FTA\_0993 deletion in *ssrA::LtrB-bp147*.

453

454 **Figure S3. Residues in the ArfA-interacting region of *E. coli* RF2 are conserved in**

455 ***F. tularensis* RF2.** Alignments of RF2 from *E. coli* and *F. tularensis* using blastp (26).

456 Residues in RF2  $\beta$ 4 (red),  $\beta$ 5 (blue), and the SPF loop (gold) are indicated.

457

458 **Figure S4. *arfT* mRNA accumulates in *F. tularensis*.** cDNA from wild type (wt),

459 *ssrA::LtrB-bp147*, wild expressing *arfT* from a plasmid (wt + pArfT), or wild type

460 expressing *ssrA* from a plasmid (wt + pFtssrA) was used as template for qPCR

461 amplification of *arfT*. The relative florescence units (RFU) are plotted as a function of

462 PCR cycle, and the positive amplification threshold is indicated by the black line.

463

## 464 **References**

465

466 1. Keiler KC, Feaga HA. 2014. Resolving Nonstop Translation Complexes Is a  
467 Matter of Life or Death. *J Bacteriol.* 196:2123-2130.

468 2. Keiler KC. 2015. Mechanisms of Ribosome Rescue in Bacteria. *Nature Reviews.*  
469 13:285-97.

470 3. Ito K, Chadani Y, Nkamori K, Chiba S, Akiyama Y, Abo T. 2011. Nascentome  
471 analysis uncovers futile protein synthesis in *Escherichia coli*. *PLoS One.*  
472 6:e28413.

473 4. Ito K, Uno M, Nakamura Y. 2000. A tripeptide “anticodon” deciphers stop codons  
474 in messenger RNA. *Nature.* 403:680-684.

475 5. Korostelev AA. 2011. Structural aspects of translation termination on the  
476 ribosome. *RNA.* 17:1409–1421.

- 477 6. Keiler KC, Waller PR, Sauer RT. 1996. Role of a peptide tagging system in  
478 degradation of proteins synthesized from damaged messenger RNA. *Science*.  
479 271: 990-993.
- 480 7. Karzai AW, Susskind MM, Sauer RT. 1999. SmpB, a unique RNA-binding protein  
481 essential for the peptide-tagging activity of SsrA (tmRNA). *EMBO J*. 18:3793-  
482 3799.
- 483 8. Hudson C M, Lau BY and Williams KP. 2014. Ends of the line for tmRNA–SmpB.  
484 *Front. Microbiol*. 5:421.
- 485 9. Feaga HA, Viollier PH, Keiler KC. 2014. Release of Nonstop Ribosomes Is  
486 Essential. *mBio*. 5:1916-14.
- 487 10. Chadani Y, Ono K, Ozawa S, Takahashi Y, Takai K, Nanamiya H, Tozawa Y,  
488 Kutsukake K, Abo T. 2010. Ribosome rescue by *Escherichia coli* ArfA (YhdL) in  
489 the absence of trans-translation system. *Mol Microbiol*. 78:796-808.
- 490 11. Chadani Y, Ito K, Kutsukake K, Abo T. 2012. ArfA recruits release factor 2 to  
491 rescue stalled ribosomes by peptidyl-tRNA hydrolysis in *Escherichia coli*.  
492 *Mol. Microbiol*. 86:37–50.
- 493 12. Shimizu Y. 2012. ArfA recruits RF2 into stalled ribosomes. *J Mol Biol*. 423:624–  
494 631.
- 495 13. James N R, Brown A, Gordiyenko Y, Ramakrishnan V. 2016. Translation  
496 termination without a stop codon. *Science*. 354:1437-1440.
- 497 14. Zeng F, Chen y, Remis J, Shekhar M, Phillips JC, Tajkhorshid E, Jin H. 2017.  
498 Structural Basis of Co-translational Quality Control by ArfA and RF2 Binding to  
499 Ribosome. *Nature*. 541:554-557.
- 500

- 501 15. Huter P, Muller C, Beckert B, Arenz S, Berninghausen O, Beckmann R, Wilson  
502 DN. 2017. Structural basis for ArfA-RF2-mediated translation termination on  
503 mRNAs lacking stop codons. *Nature*. 541:546-549.
- 504 16. Ma C, Kurita D, Li N, Chen Y, Himeno H, Gao N. 2017. Mechanistic insights into  
505 the alternative translation termination by ArfA and RF2. *Nature*. 541:550-553.
- 506 17. Chadani Y, Ono K, Kutsukake K, Abo T. 2011. Escherichia coli YaeJ protein  
507 mediates a novel ribosome-rescue pathway distinct from SsrA- and ArfA-  
508 mediated pathways. *Mol Microbiol*. 80:772-785.
- 509 18. Handa Y, Inaho N, Nameki N. 2011. YaeJ is a novel ribosome-associated protein  
510 in Escherichia coli that can hydrolyze peptidyl-tRNA on stalled ribosomes.  
511 *Nucleic Acids Res*. 39:1739-1748.
- 512 19. Gagnon MG, Seetharaman SV, Bulkley D, Steitz TA. 2012. Structural basis for  
513 the rescue of stalled ribosomes: structure of YaeJ bound to the ribosome.  
514 *Science*. 16:1307-1372.
- 515 20. Kogure H, Handa Y, Nagata M, Kanai N, Guntert P, Kubota K. 2014.  
516 Identification of residues required for stalled-ribosome rescue in the codon –  
517 independent release factor YaeJ. *Nucleic Acids Res*. 42:3152-3163.
- 518 21. Svetlanov A, Puri N, Mena P, Koller A, Karzai AW. 2012. *Francisella tularensis*  
519 tmRNA System Mutants are Vulnerable to Stress, Avirulent in Mice, and Provide  
520 Effective Immune Protections. *Mol Microbiol*. 85:122-141.
- 521 22. Carvalho CI, Lopes De Carvalho I, Zé-Zé L, Nuncio MS and Duarte EL. 2014.  
522 Tularaemia: A Challenging Zoonosis. *Comp Immunol Microbiol Infect Dis*. 37:85-  
523 89.

- 524 23. Sjöstedt A. 2007. Tularemia: history, epidemiology, pathogen physiology, and  
525 clinical manifestations. *Ann Acad Sci.* 1105:1–29.
- 526 24. Oyston PC. 2008. *Francisella tularensis*: unravelling the secrets of an  
527 intracellular pathogen. *J Med Microbiol.* 57:921–930.
- 528 25. Bosio CM, Bielefeldt-Ohmann H, Belisle JT. 2007. Active suppression of the  
529 pulmonary immune response by *Francisella tularensis* Schu4. *J Immunol.*  
530 178:4538–4547.
- 531 26. Tärnvik A, Berglund L. 2003. Tularaemia. *Eur Respir J.* 21:361–373.
- 532 27. Center for Disease Control and Prevention. 2013. Tularemia - United States,  
533 2001-2010. *MMWR Morb Mortal Wkly Rep.* 62:963–966.
- 534 28. Cowely SC, Elkins KL. 2011. Immunity to *Francisella*. *Front Microbiol.* 16:26.
- 535 29. Maier TM, Pechous R, Casey M, Zahrt TC, Frank DW. 2006. In Vivo Himar1-  
536 Based Transposon Mutagenesis of *Francisella tularensis*. *Appl. Environ.*  
537 *Microbiol.* 72:1878-1885.
- 538 30. Maier TM, Casey MS, Becker RH, Dorsey CW, Glass EM, Maltsev N, Zahrt TC,  
539 Frank DW. 2007. Identification of *Francisella tularensis* Himar1-based  
540 transposon mutants defective for replication in macrophages. *Infect. Immun.*  
541 75:5376-5389.
- 542 31. Madden TL, Tatusov RL, Zhang J. 1996. Applications of network BLAST server.  
543 *Meth Enzymol.* 266:131-141.
- 544 32. LoVullo ED, Molins-Schneekloth CR, Schweizer HP, Pavelka MS. 2009. Single-  
545 copy chromosomal integration systems for *Francisella tularensis*. *Microbiology.*  
546 155:1152-1163.
- 547



- 548 33. Goralski TD, Dewan KK, Alumasa JN, Avanzanto V, Place DE, Markley RL,  
549 Katkere B, Rabadi SM, Bakshi CS, Keiler KC, Kirimanjeswara, GS. 2016.  
550 Inhibitors of Ribosome Rescue Arrest Growth of *Francisella tularensis* at all  
551 Stages of Intracellular Replication. Antimicrob Agents Chemother. 60:3276-3282.
- 552 34. Ramadoss NS, Alumasa JN, Cheng L, Wang Y, Li S, Chambers BS, Chang H,  
553 Chatterjee AK, Brinker A, Engels, IH, Keiler KC. 2013. Small molecule inhibitors  
554 of *trans*-translation have broad-spectrum antibiotic activity. Proc Natl Acad Sci  
555 USA. 110:10282-10287.
- 556 35. Alumasa JN, Manzanillo PS, Peterson ND, Lundrigan T, Baughn AD, Cox JS and  
557 Keiler KC. 2017. Ribosome Rescue Inhibitors Kill Actively Growing and  
558 Nonreplicating Persister Mycobacterium tuberculosis Cells. ACS Infect Dis. 3:  
559 634-644.
- 560 36. Huter P, Müller C, Arenz S, Beckert B, Wilson D. 2017. Structural Basis for  
561 Ribosome Rescue in Bacteria. Trends Biochem Sci. 42:669-680.
- 562 37. Kurita D, Chadani Y, Muto A, Abo T and Himeno H. 2014. ArfA recognizes the  
563 lack of mRNA in the mRNA channel after RF2 binding for ribosome rescue.  
564 Nucleic Acids Res. 42:13339-13352.
- 565 38. Chadani Y, Matsumoto E, Aso H, Wada T, Kutsukake K, Sutou S, Abo T. 2011.  
566 *Trans*-translation-mediated tight regulation of the expression of the alternative  
567 ribosome-rescue factor ArfA in *Escherichia coli*. Genes Genet Syst. 86:151-163.
- 568 39. Garza-Sanchez F, Schaub RE, Janssen BD, Hayes CS. 2011. tmRNA regulates  
569 synthesis of the ArfA ribosome rescue factor. Mol Microbiol. 80:1204-1219.

- 570 40. Chamberlain RE. 1965. Evaluation of Live Tularemia Vaccine Prepared in a  
571 Chemically Defined Medium. Appl. Microbiol. 13:232-235.
- 572 41. Williamson DR, Dewan KK, Patel T, Wastella CM, Ning G, Kirimanjeswara GS  
573 2017. A single mechanosensitive channel protects *Francisella tularensis* subsp.  
574 holarctica from hypoosmotic shock and promotes survival in the aquatic  
575 environment. Appl. Environ. Microbiol. 83.
- 576

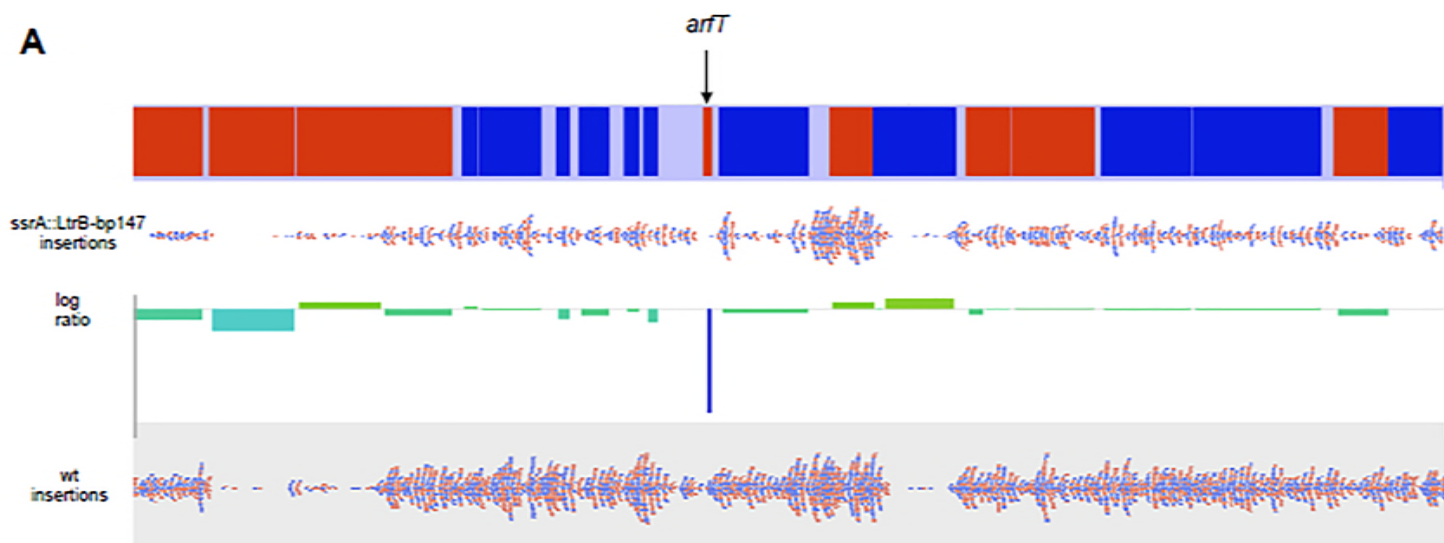

**B**

*E. coli* ArfA MSRYQHTKGQIKDNAIEALLHDPLFRQRVEKNK**KGKGS**YMRKGKHGNGRGNWEASG

*F. tularensis* ArfT MAYNEKNSSNRTEASQTRKEHDPEAFSEM**GKKGGS**TNKK

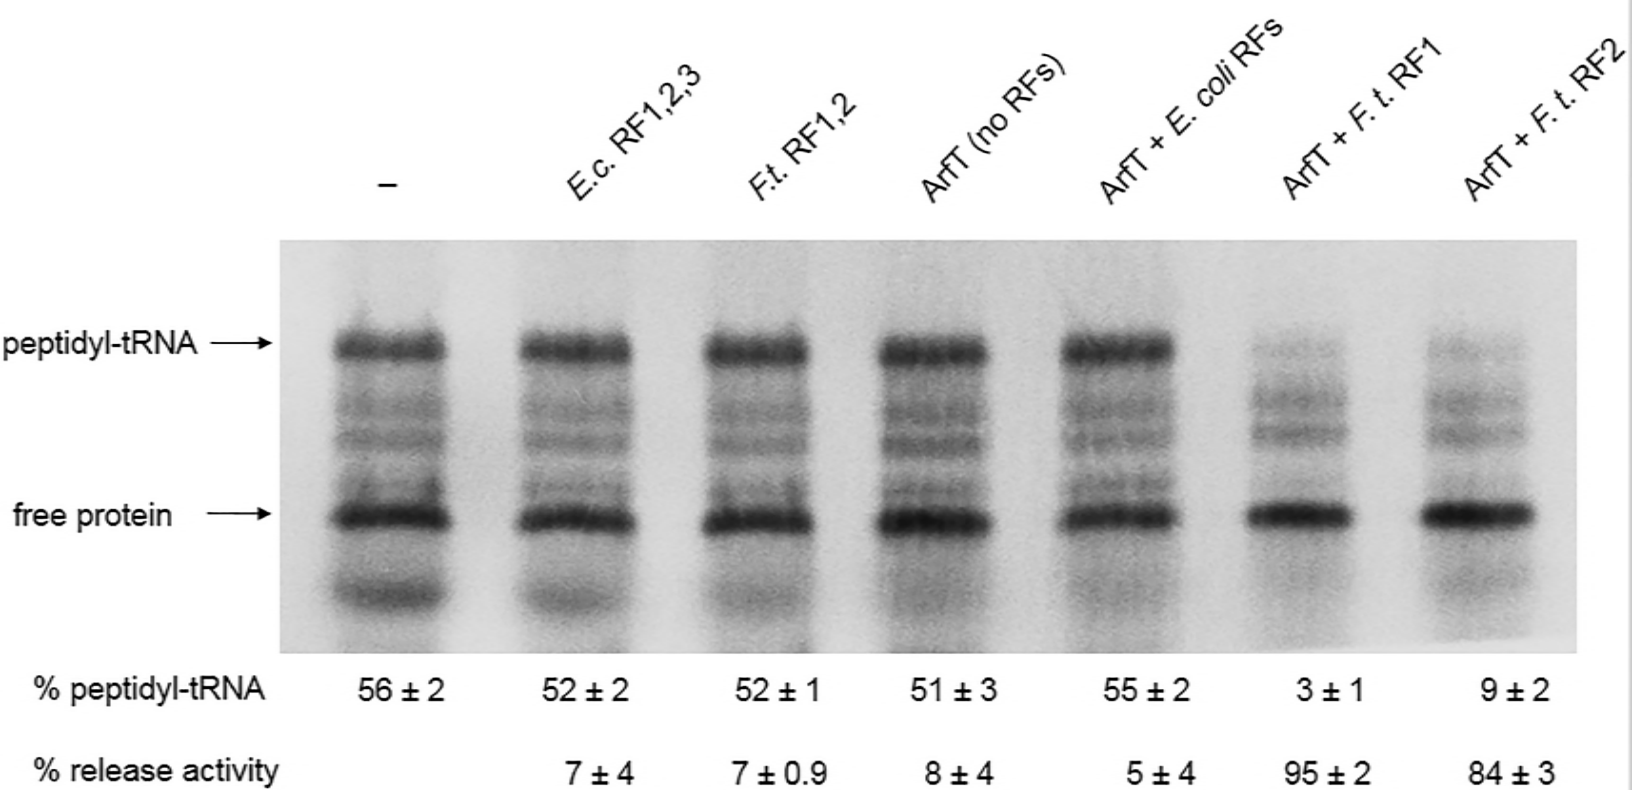

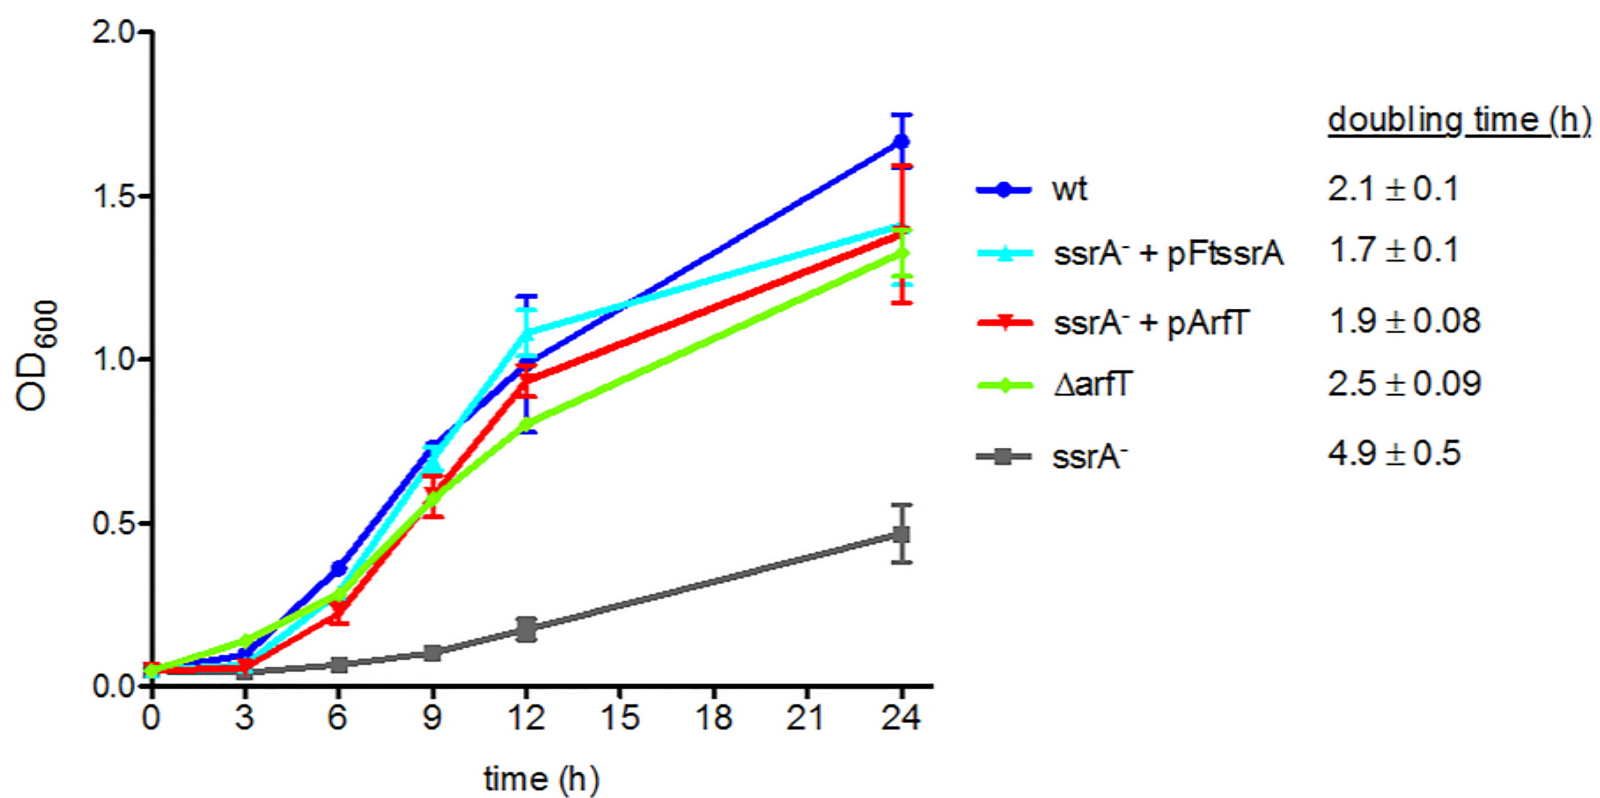

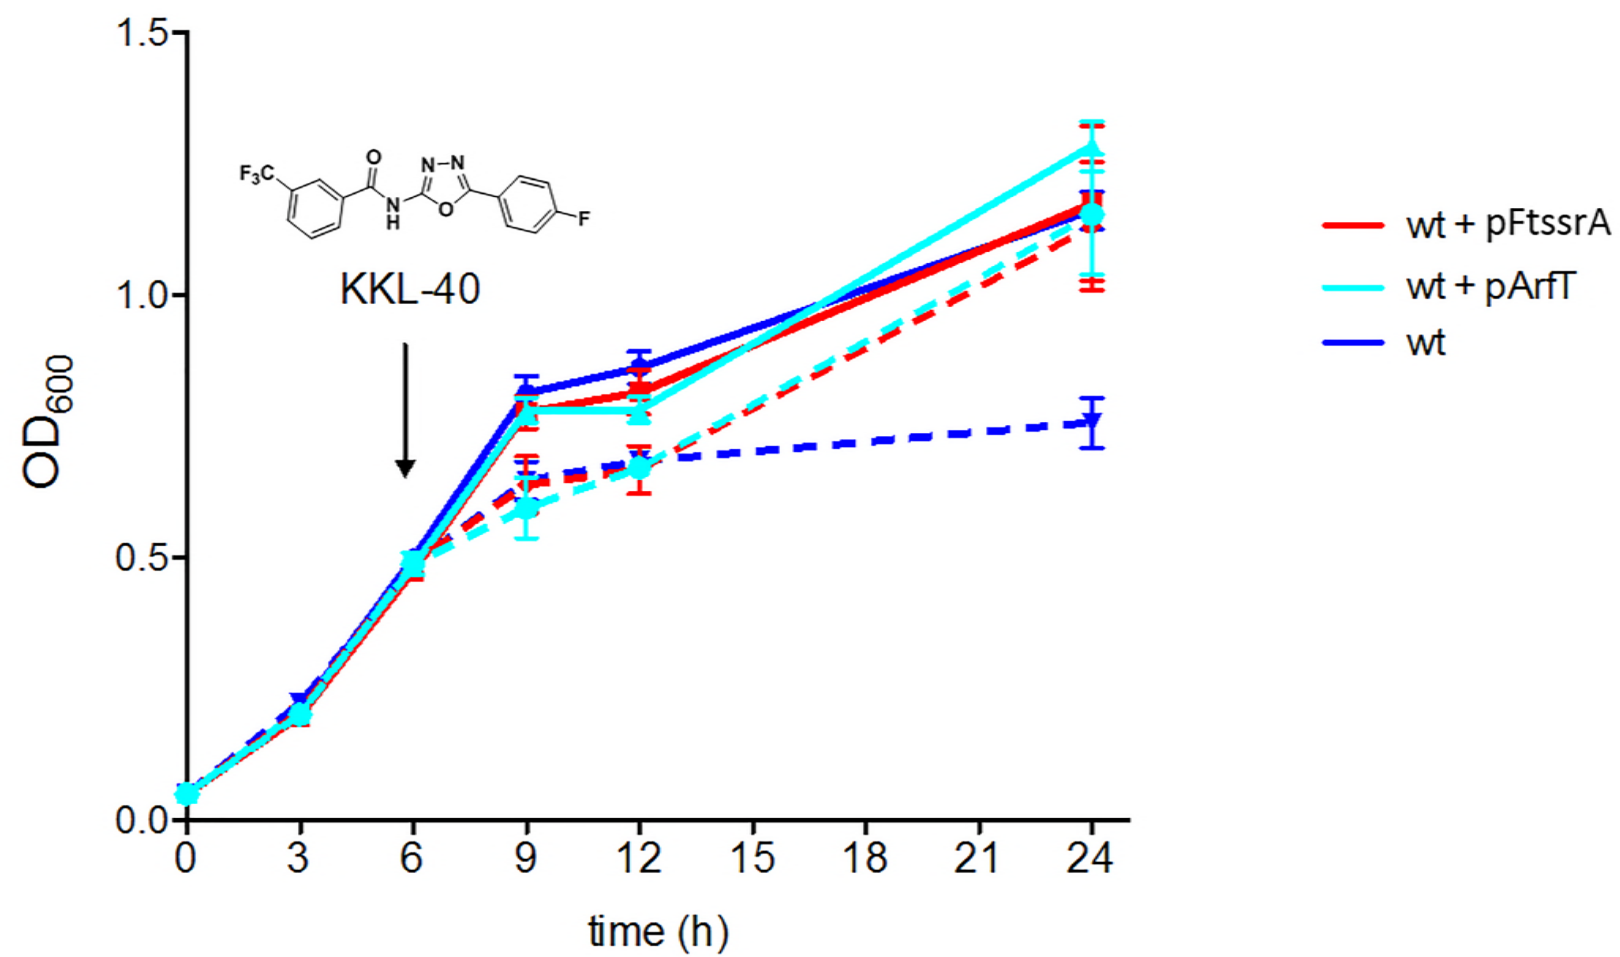

Source: https://www.biorxiv.org/content/10.1101/465609v1.full.pdf
